# Supplementary material
Source: ML conference proceedings conference paper supplement (https://aclanthology.org/2026.semeval-1.286)

# System Architecture Pipeline

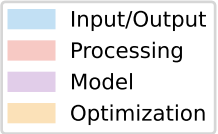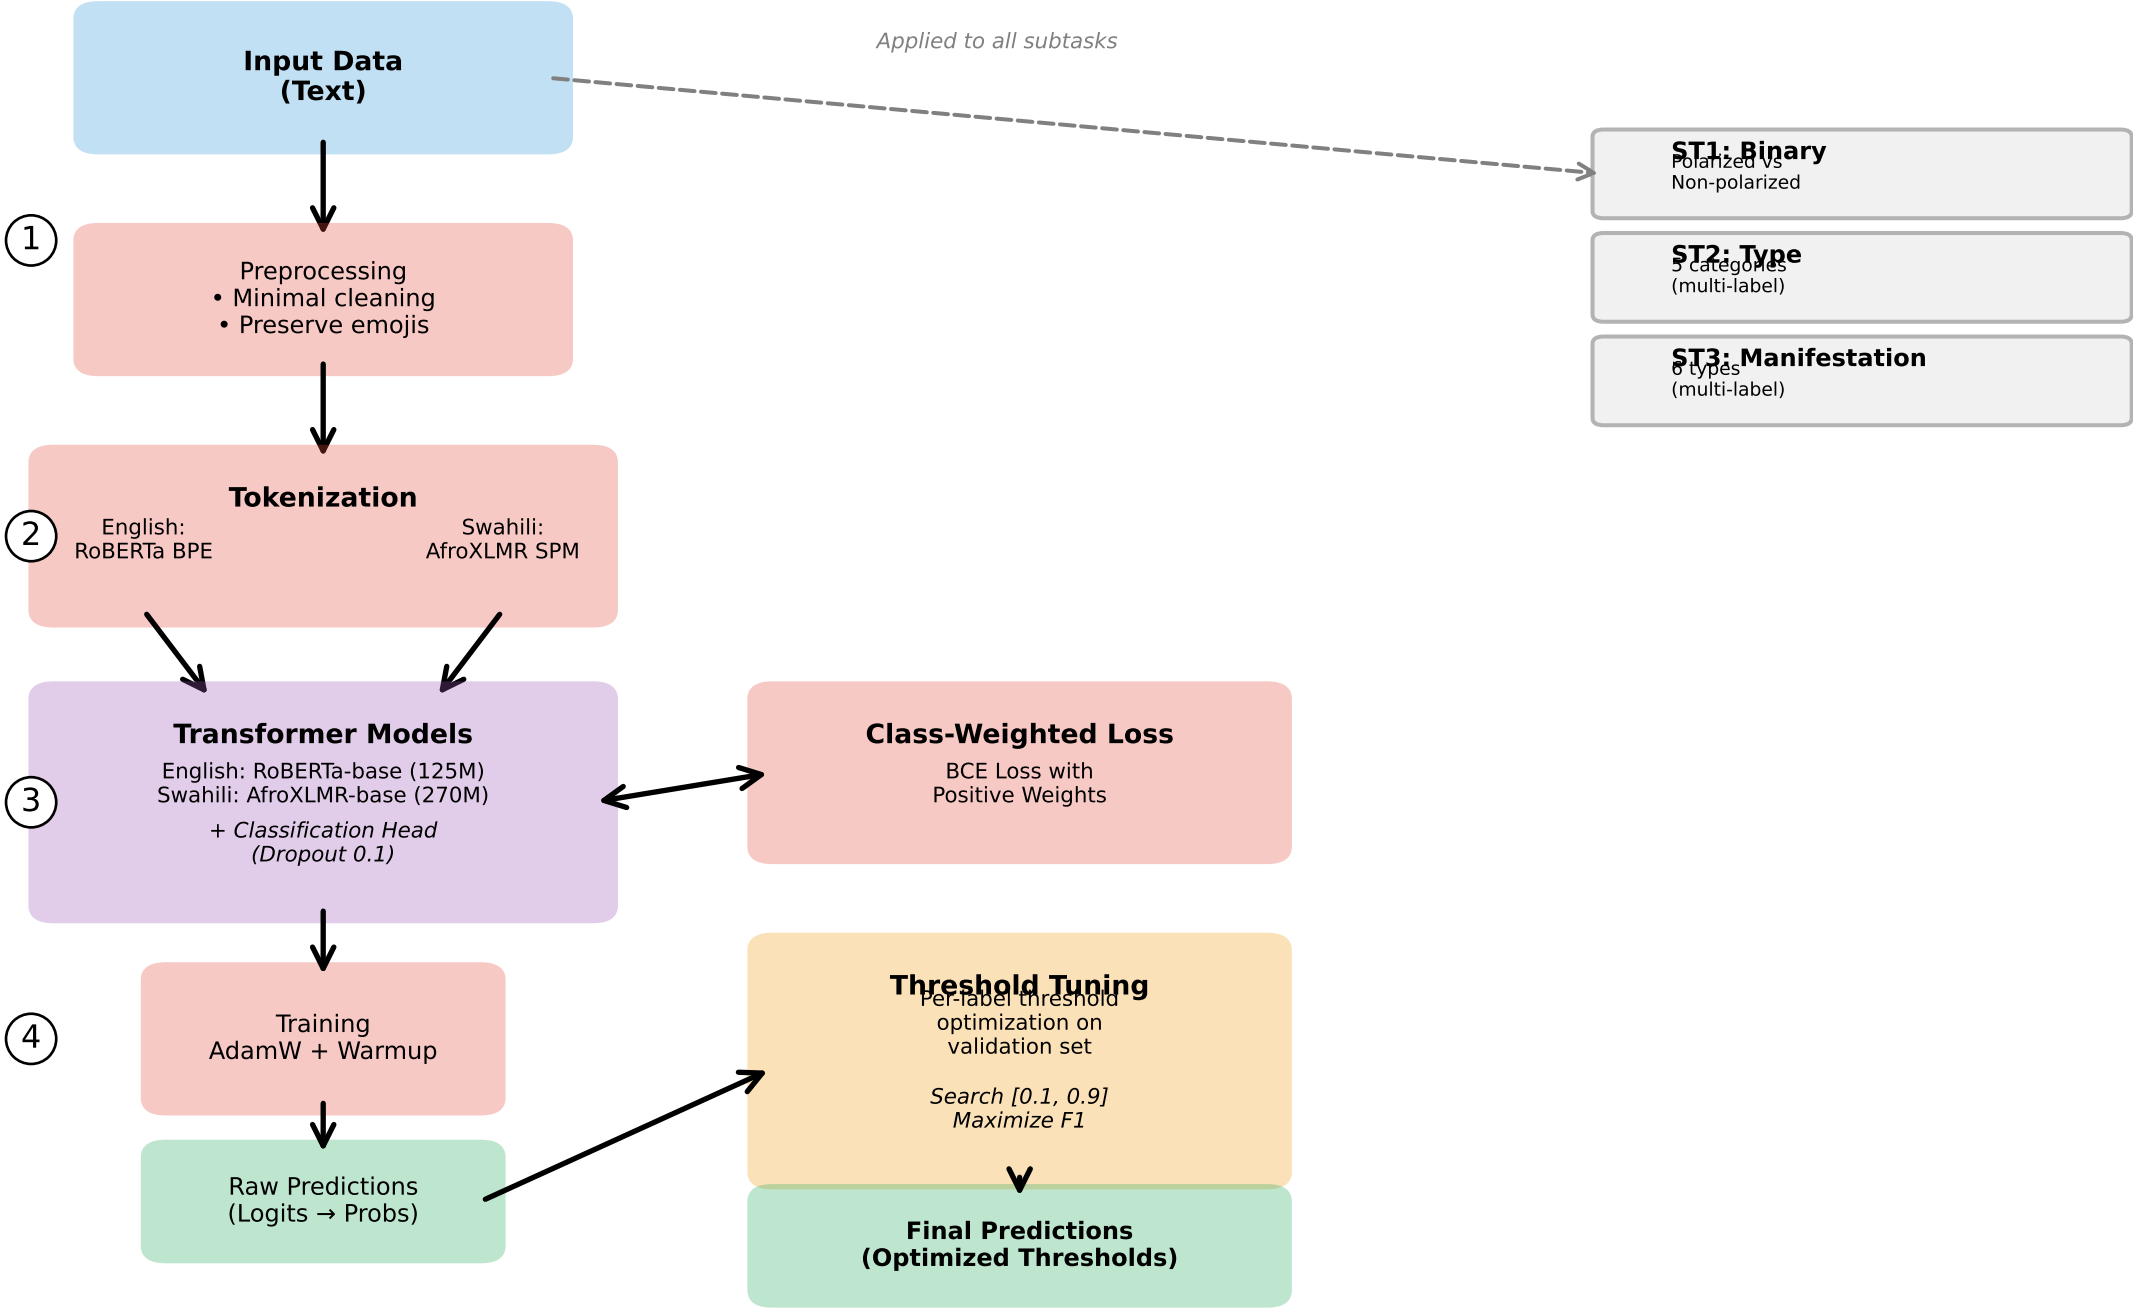

Supplement: SupplementaryMaterial [file architecture.pdf › latex/architecture.pdf]

### Subtask 2: Impact of Class Weighting (English)

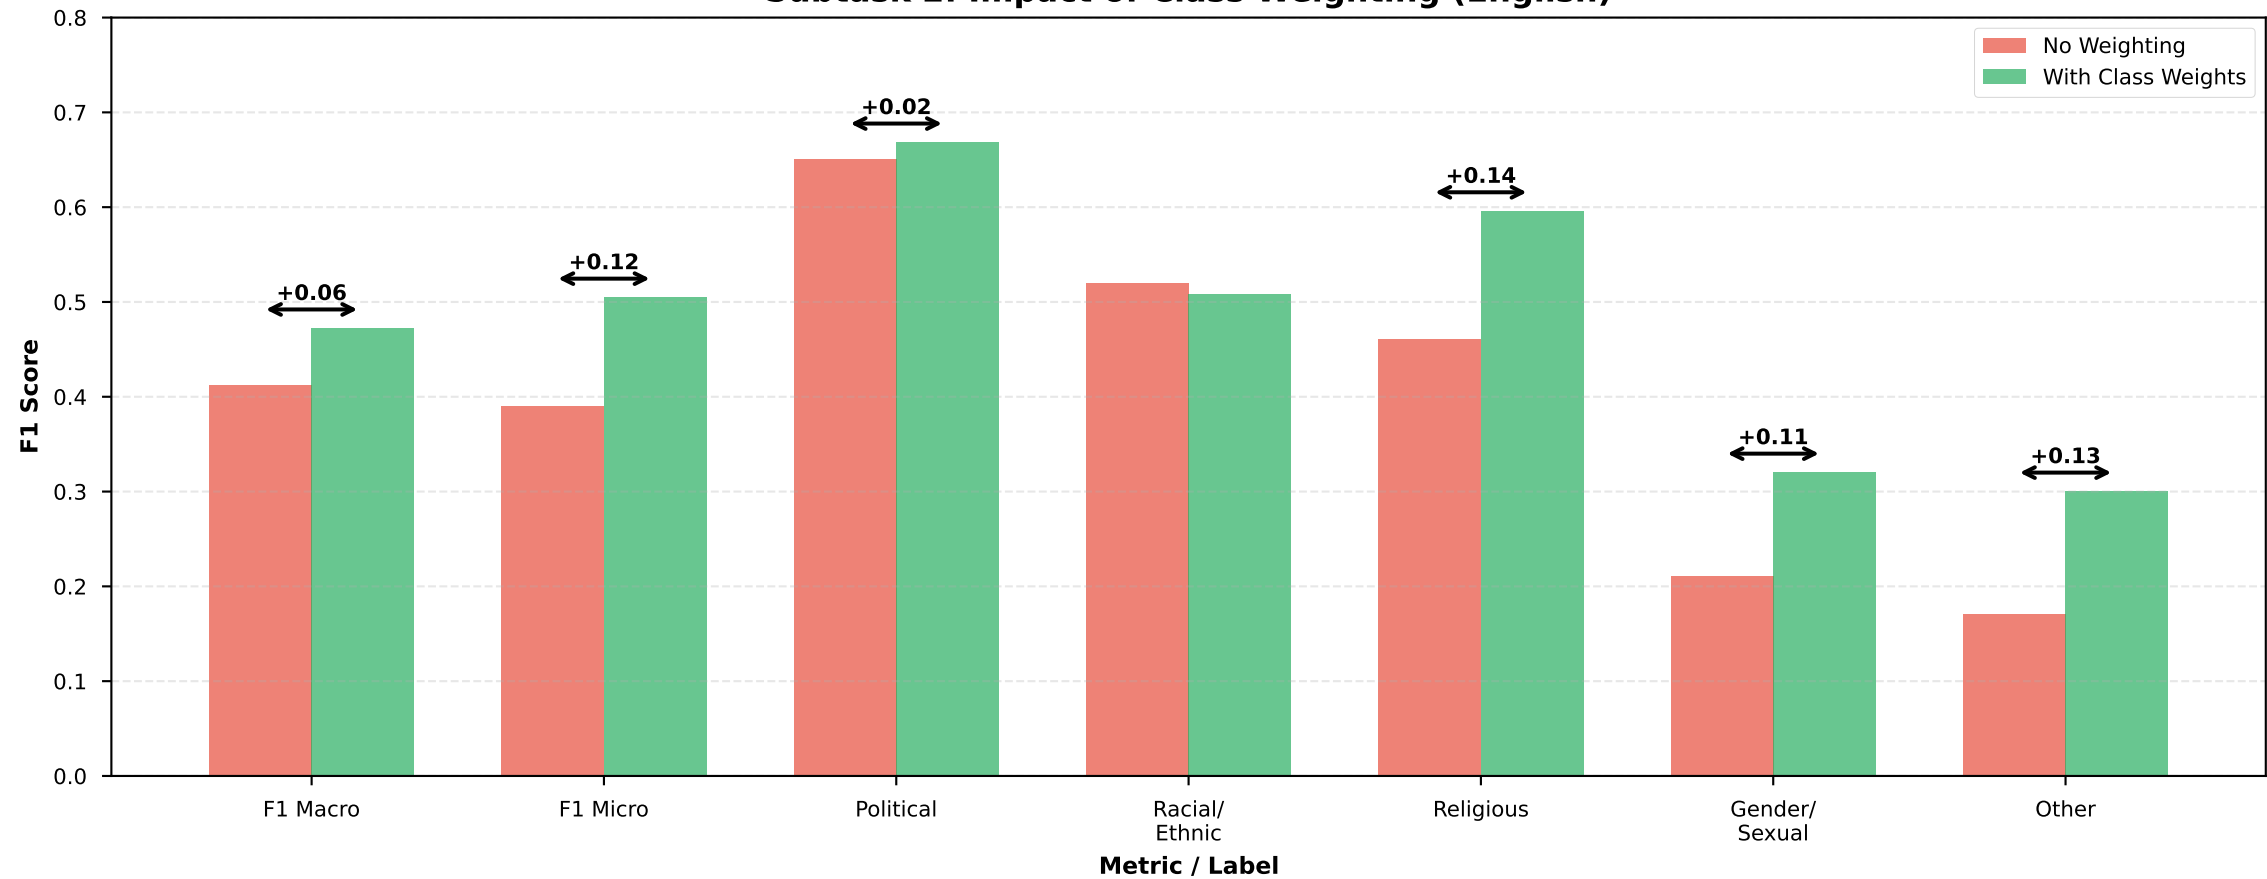

Supplement: SupplementaryMaterial [file class_weighting.pdf › latex/class_weighting.pdf]

**Subtask 1: Error Types**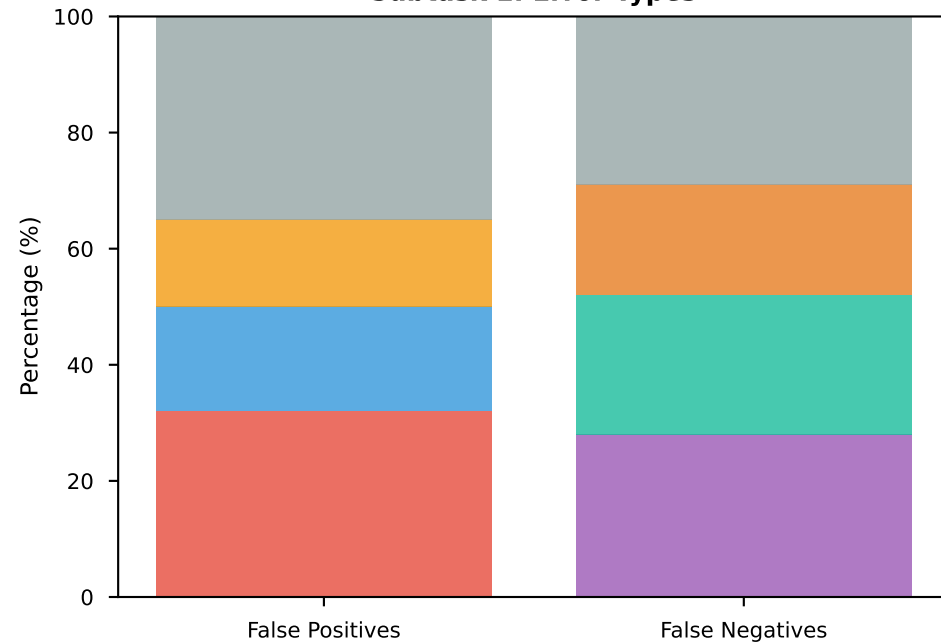**Subtask 2: Error Distribution**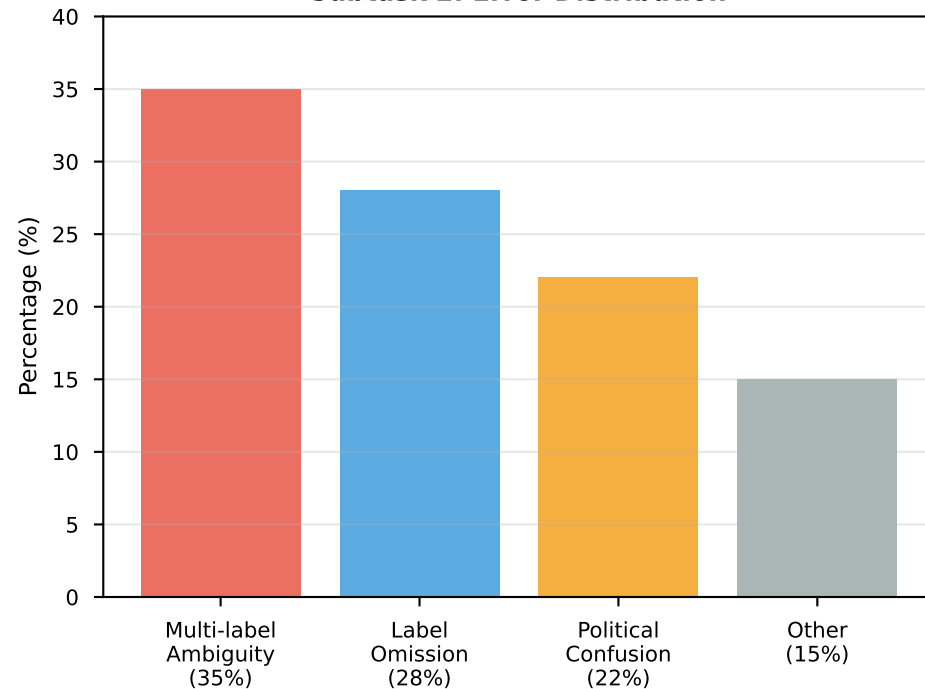**Subtask 3: Error Distribution**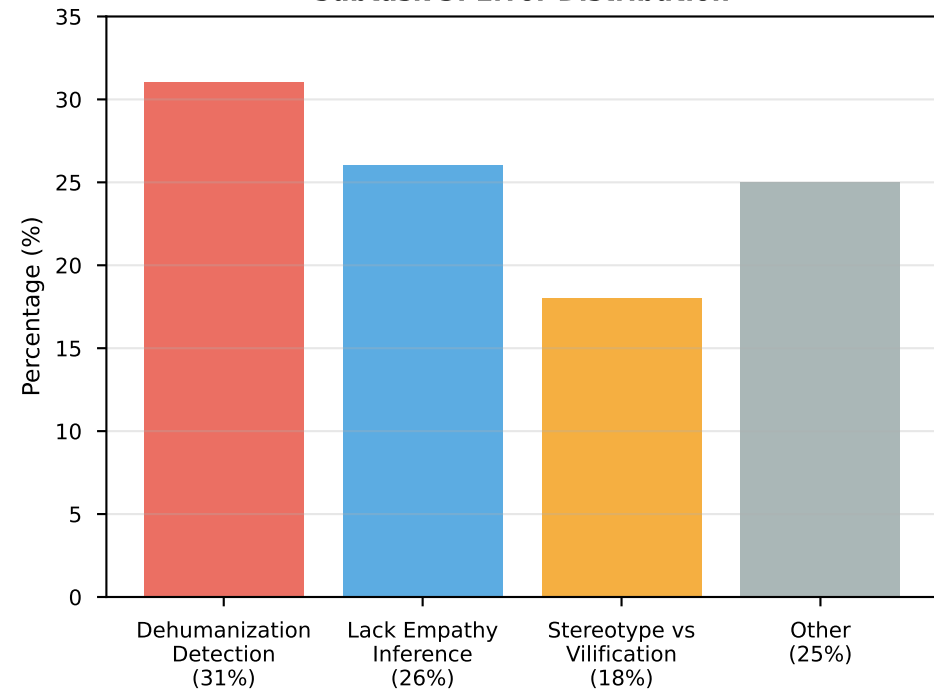

Supplement: SupplementaryMaterial [file error_analysis.pdf › latex/error_analysis.pdf]

**Subtask 1: Model Architecture Comparison (English)**

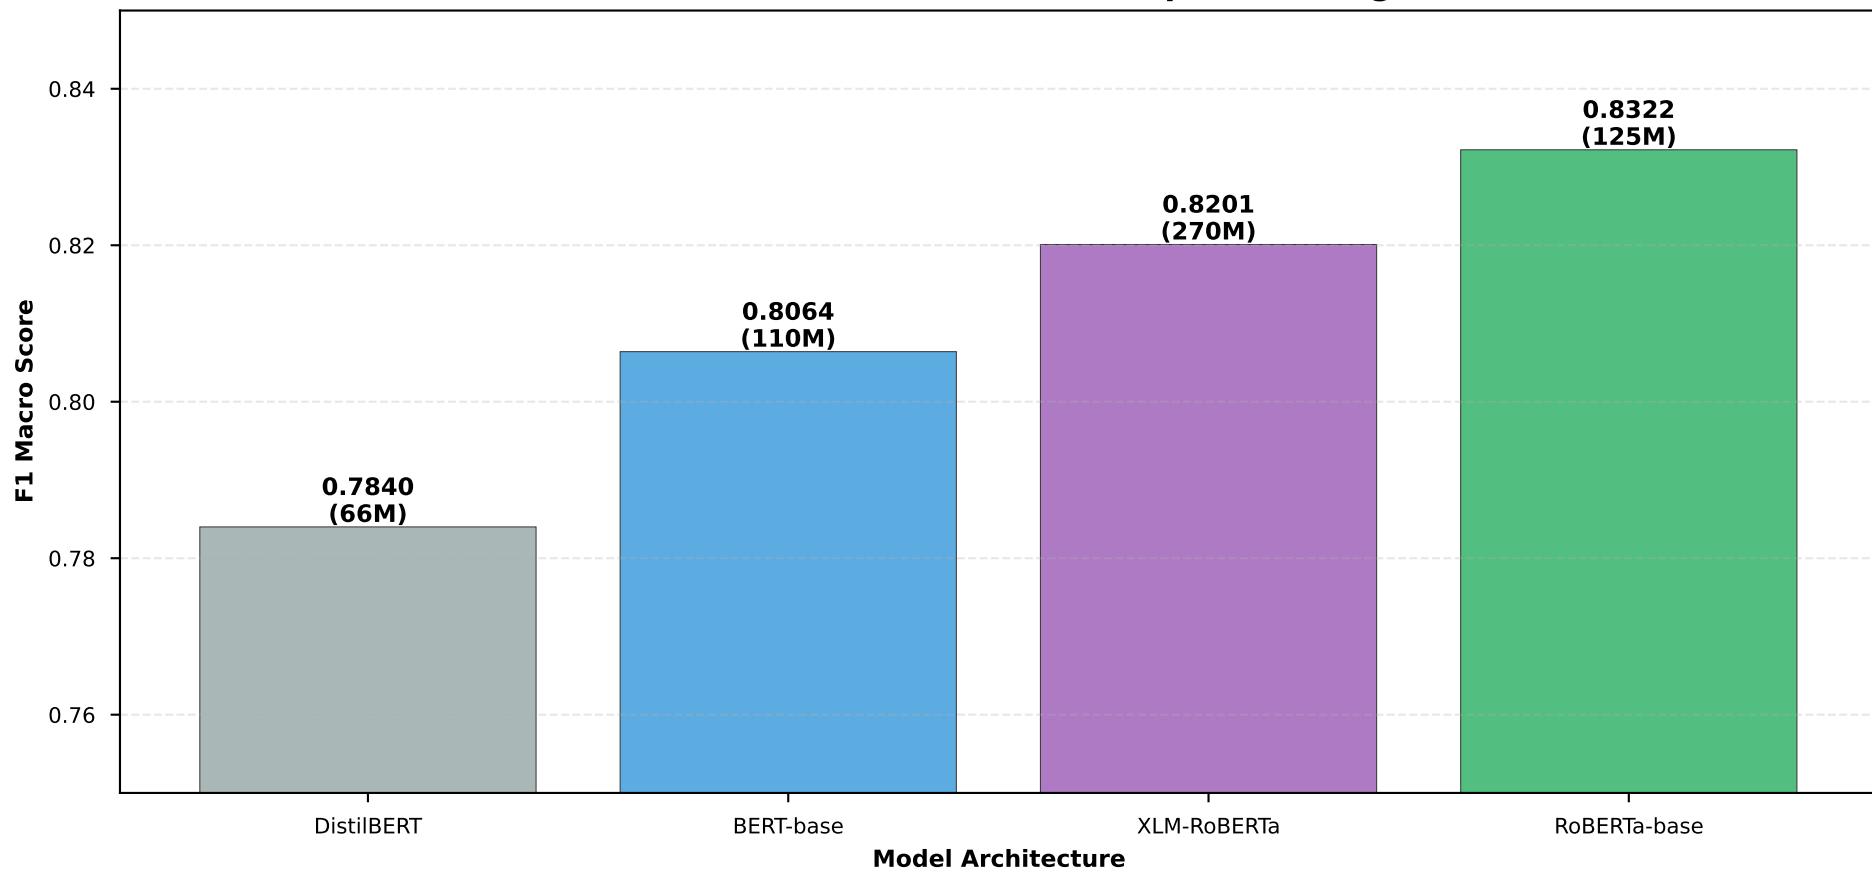

Supplement: SupplementaryMaterial [file model_comparison.pdf › latex/model_comparison.pdf]

**Subtask 1  
(Binary)**

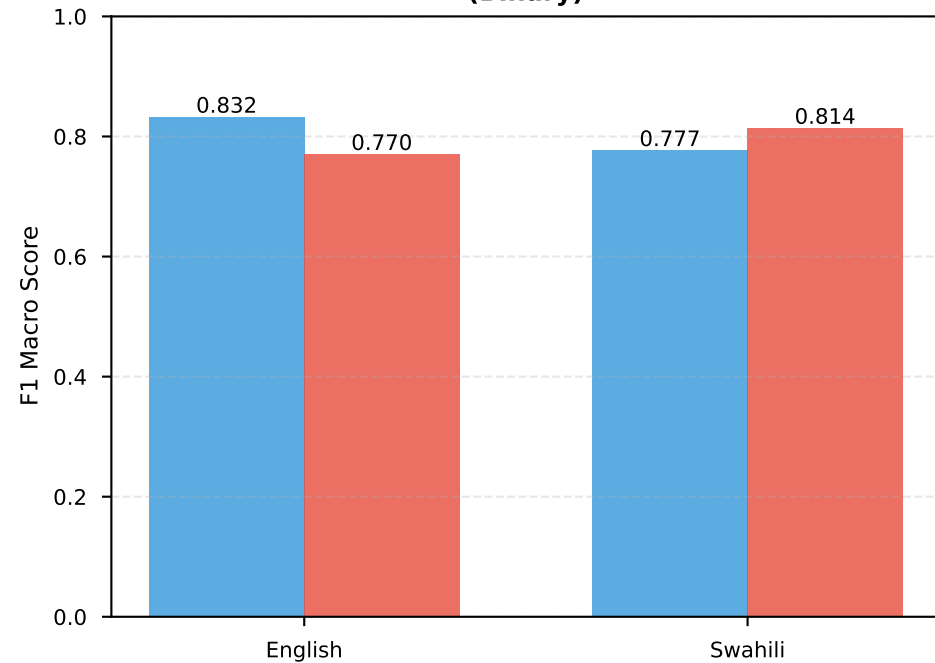

**Subtask 2  
(Multi-label)**

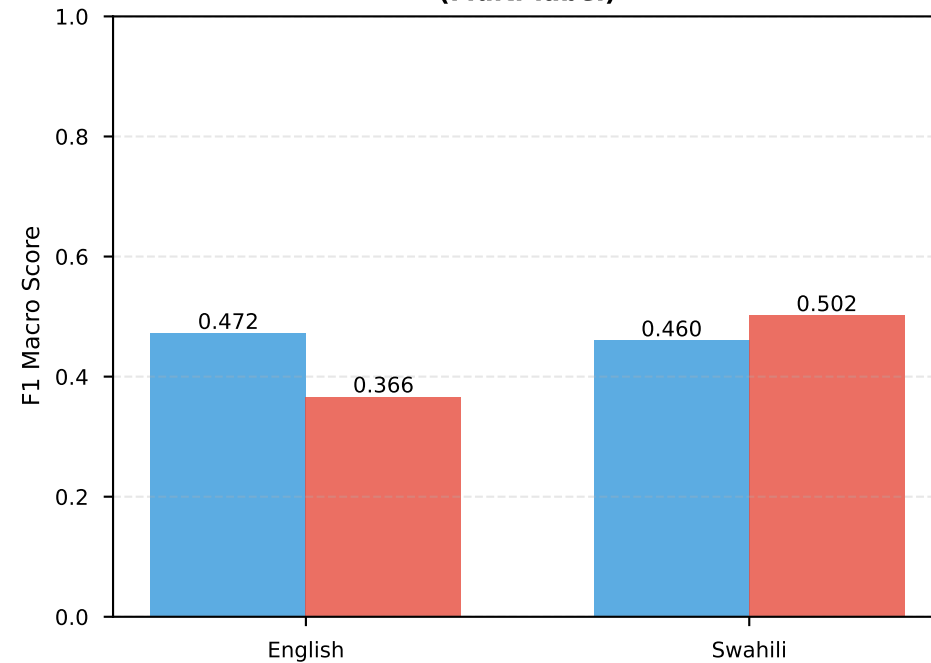

**Subtask 3  
(Multi-label)**

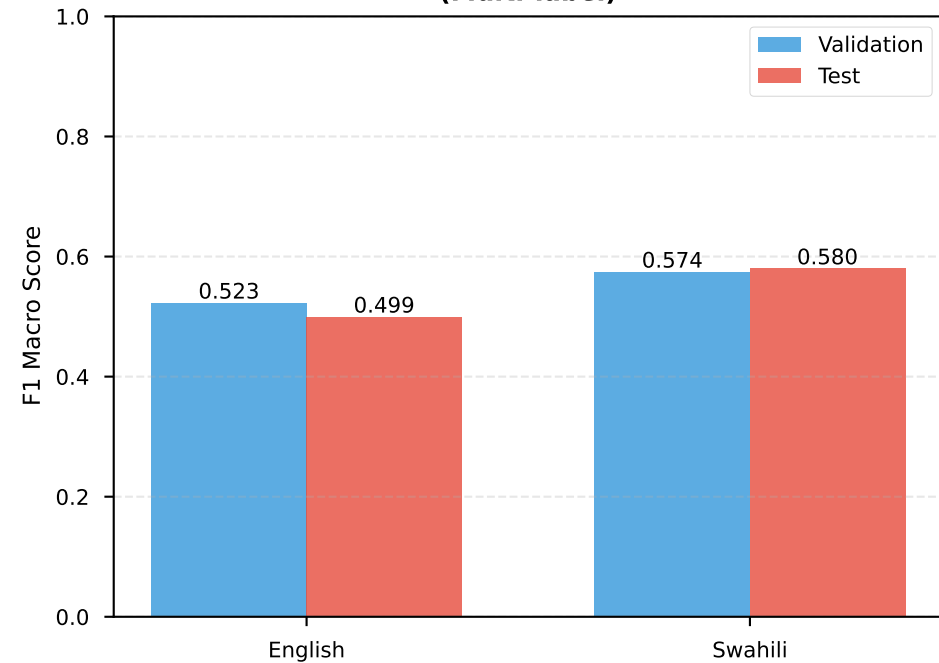

Supplement: SupplementaryMaterial [file overall_performance.pdf › latex/overall_performance.pdf]

**Subtask 2: Per-Label F1 Scores (Validation)**

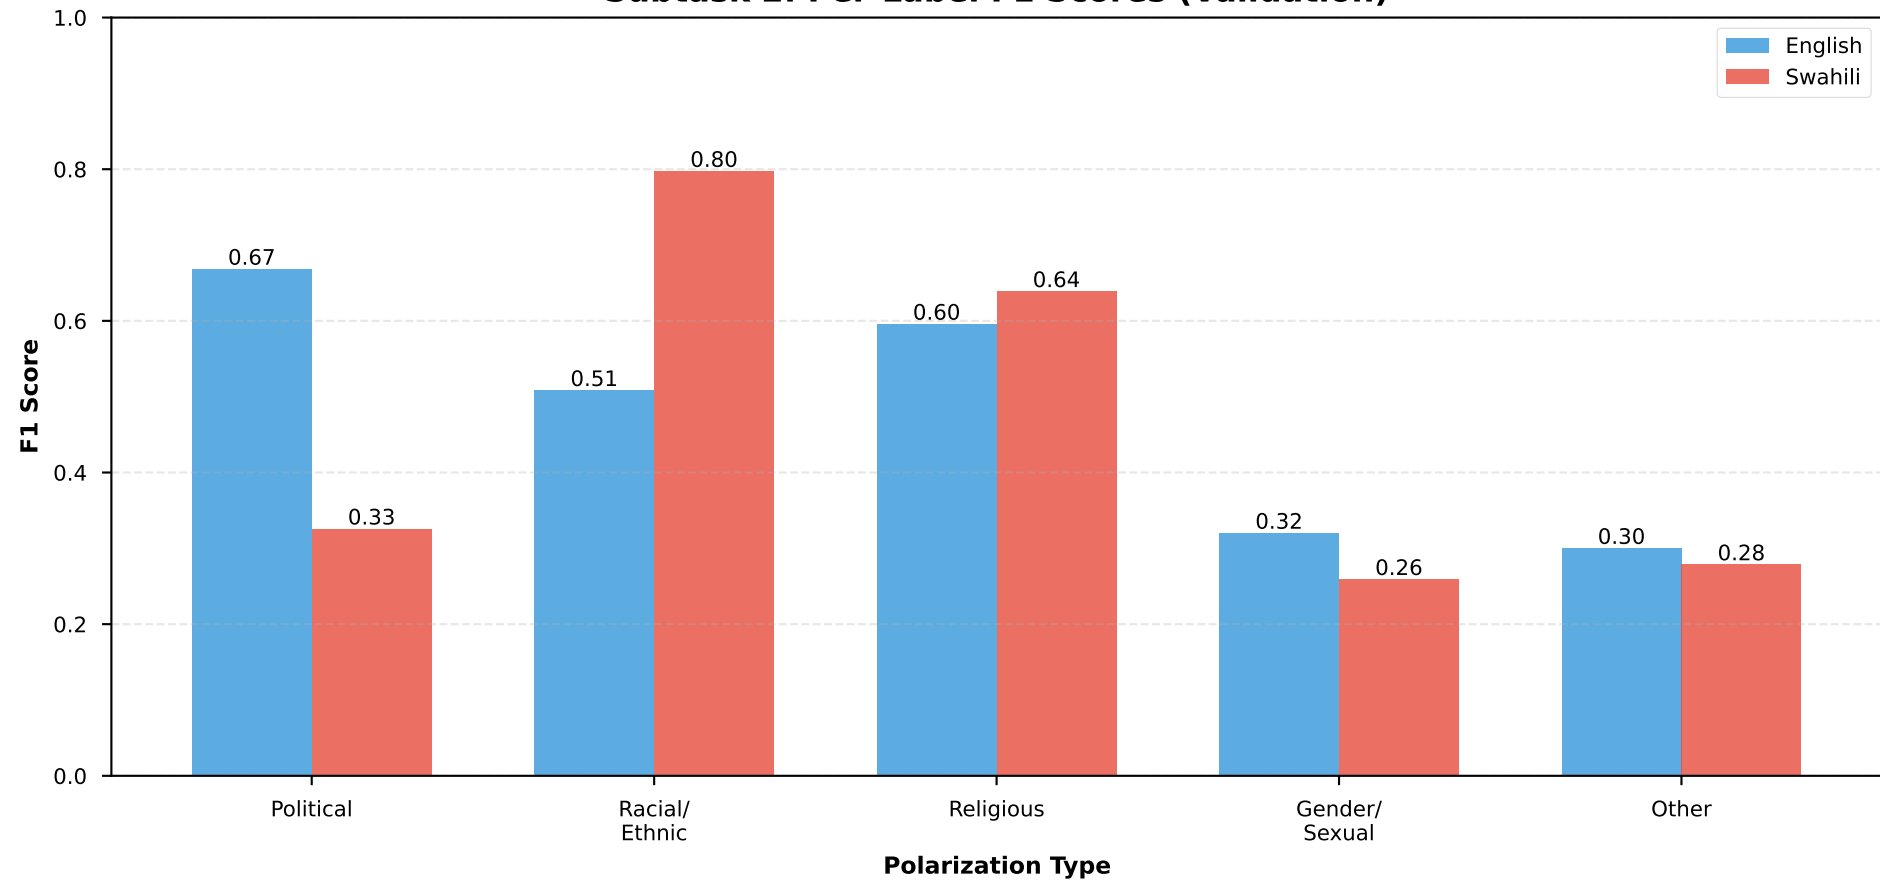

Supplement: SupplementaryMaterial [file subtask2_per_label.pdf › latex/subtask2_per_label.pdf]

**Subtask 3: Per-Label F1 Scores (Validation)**

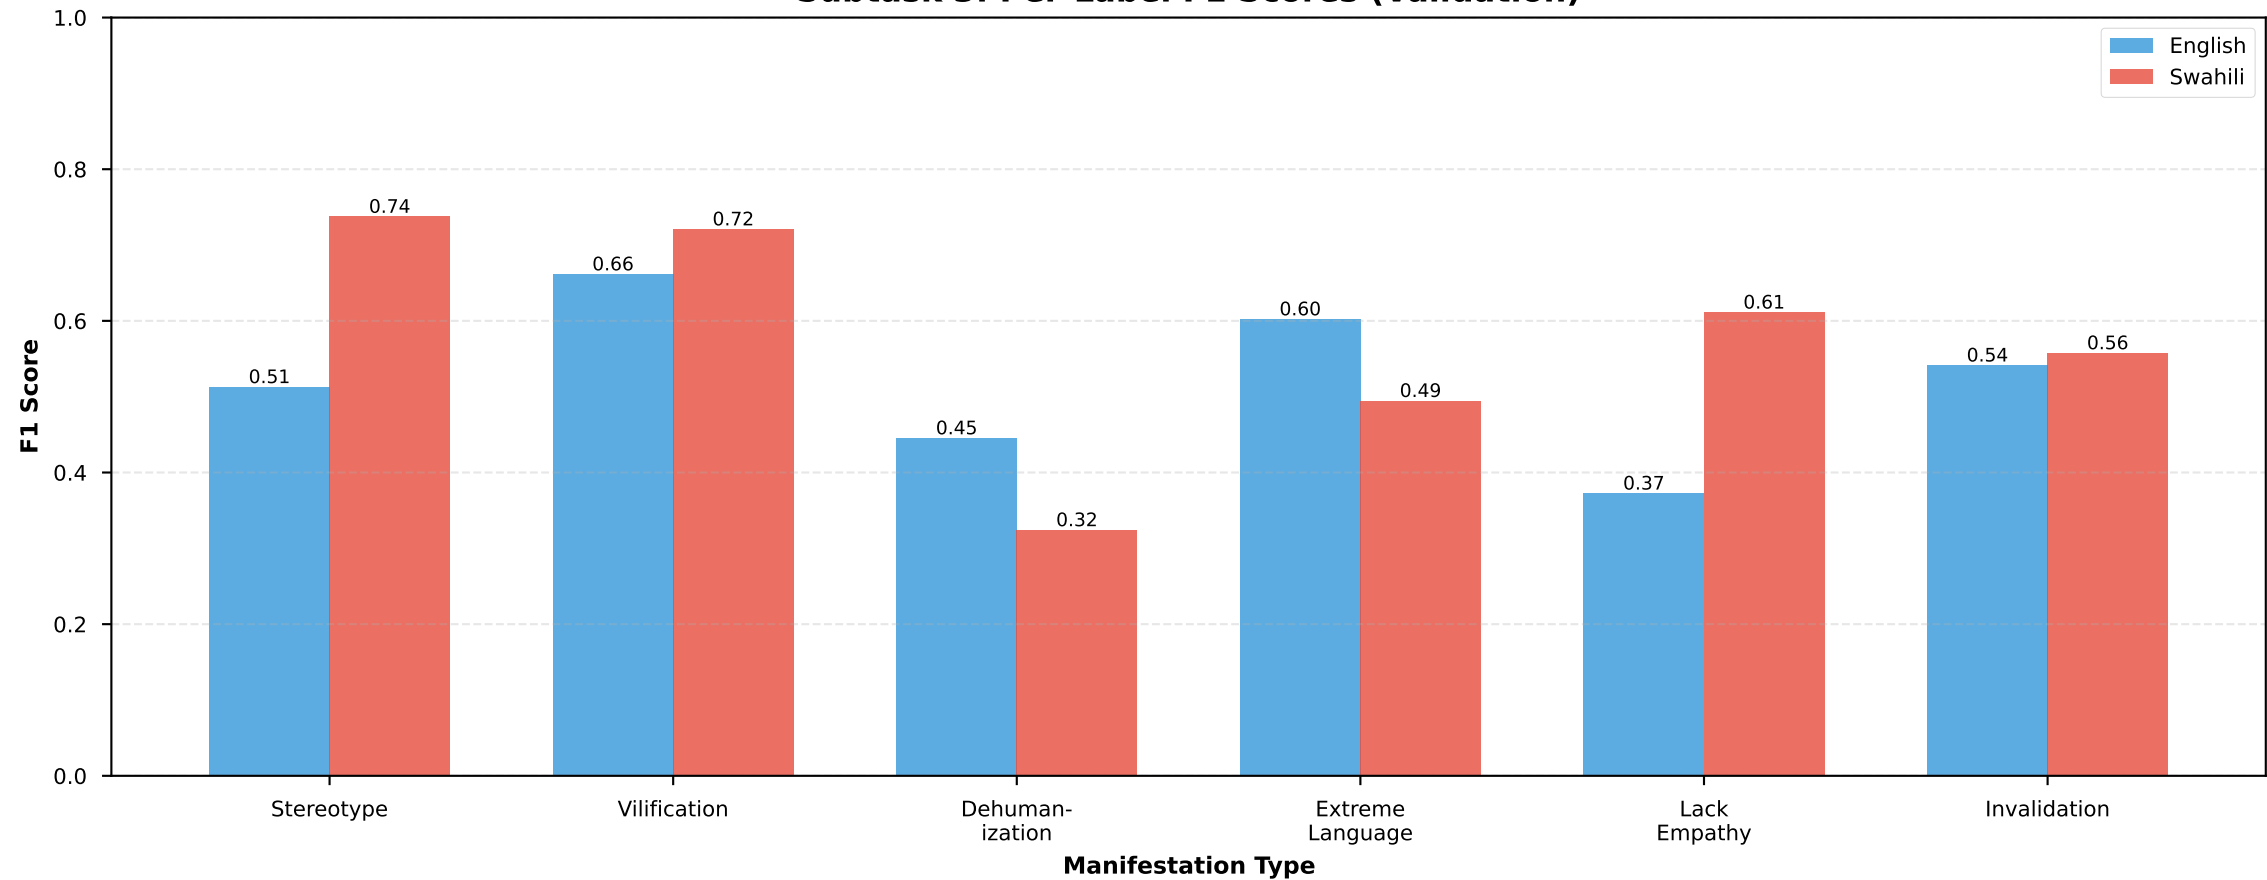

Supplement: SupplementaryMaterial [file subtask3_per_label.pdf › latex/subtask3_per_label.pdf]

**Subtask 2: Threshold Tuning (English)**

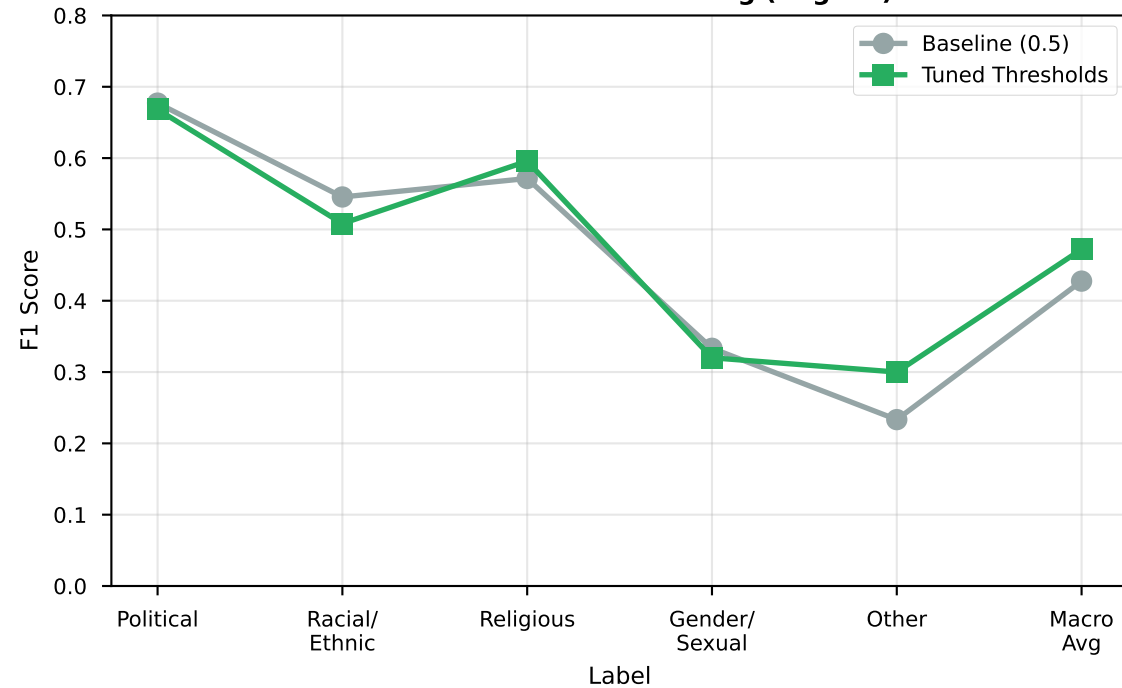

**Subtask 3: Threshold Tuning (English)**

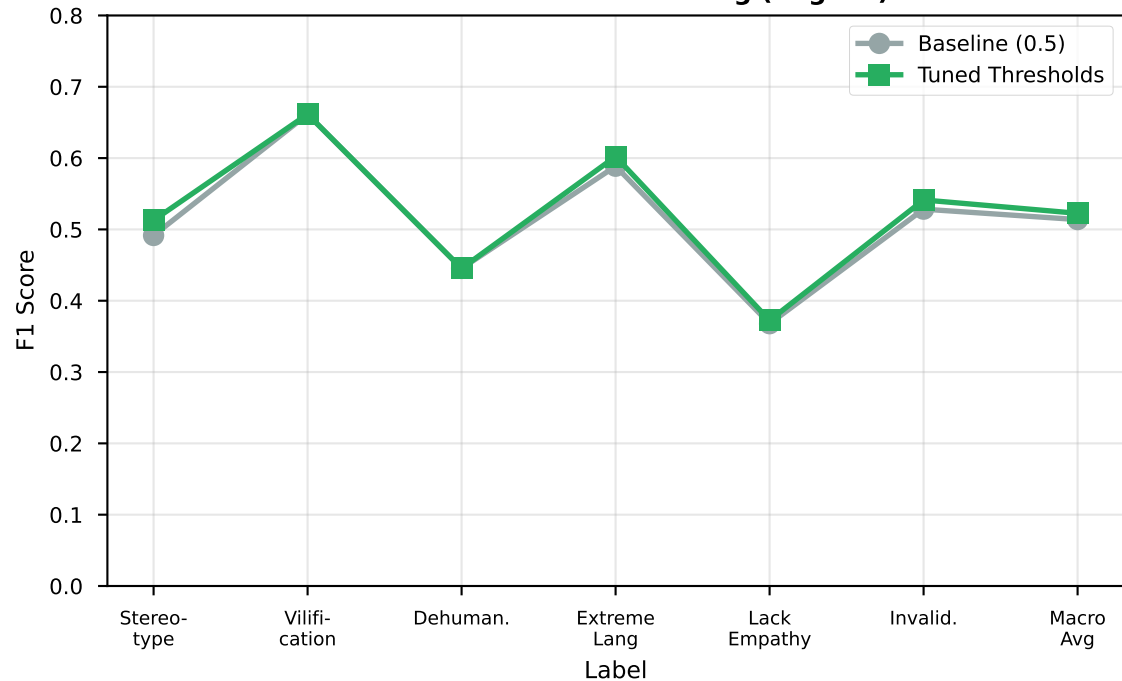

Supplement: SupplementaryMaterial [file threshold_tuning.pdf › latex/threshold_tuning.pdf]
